# Supplementary material for: Are There Neurophenotypes for Asthma? Functional Brain Imaging of the Interaction between Emotion and Inflammation in Asthma
Source: PubMed Central journal article supplement (PMC3411610; doi:10.1371/journal.pone.0040921), 2012-08-01
Supplement: pone.0040921.s003.pdf [file pone.0040921.s003.pdf]

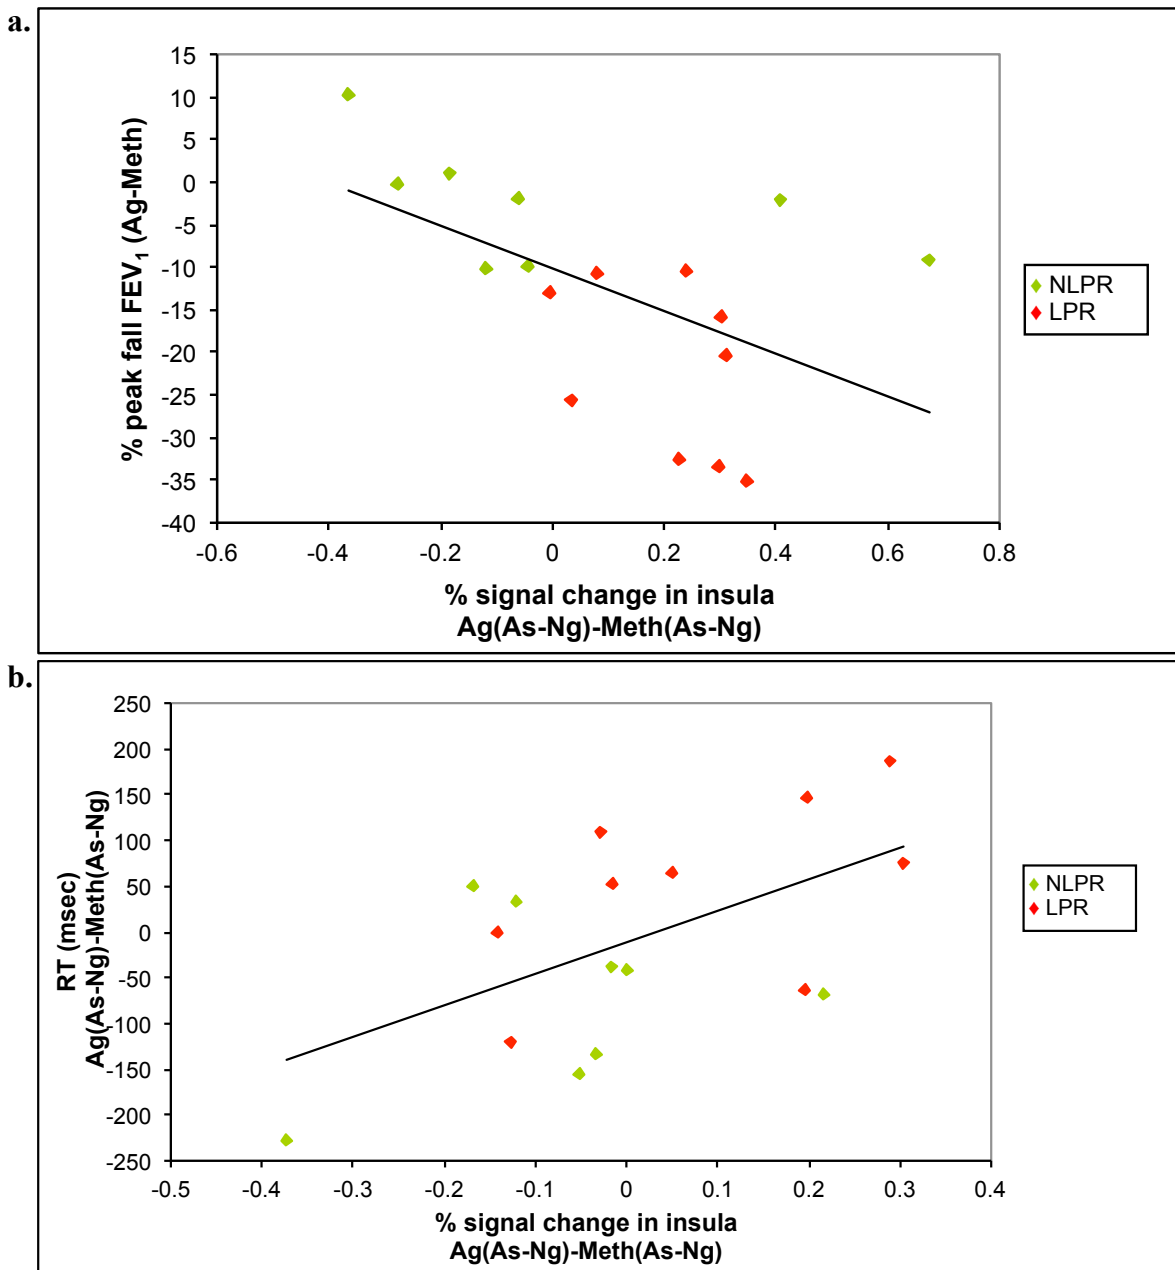

**Figure 4:** Insula activity predicts magnitude of airway obstruction and cognitive interference of disease-related information during the late phase response to Ag in asthmatic participants.

Percent signal change in the right mid- and posterior insula in response to asthma compared to negative words [As-Ng] and (a) percent peak fall in FEV<sub>1</sub> [Ag-Meth] ( $r = -.53, p = .03$ ) and (b) reaction time to identify the color of As words, relative to Ng words

[Ag(As-Ng)-Meth(As-Ng)] ( $r = .55, p < .05$ ) during late phase antigen relative to methacholine challenge.
