# Supplementary material for: Are There Neurophenotypes for Asthma? Functional Brain Imaging of the Interaction between Emotion and Inflammation in Asthma
Source: PLOS journal article supplement (doi:10.1371/journal.pone.0040921), 2012-08-01
Supplement: S2 (10.1371/journal.pone.0040921.s002) [file journal.pone.0040921.s002]

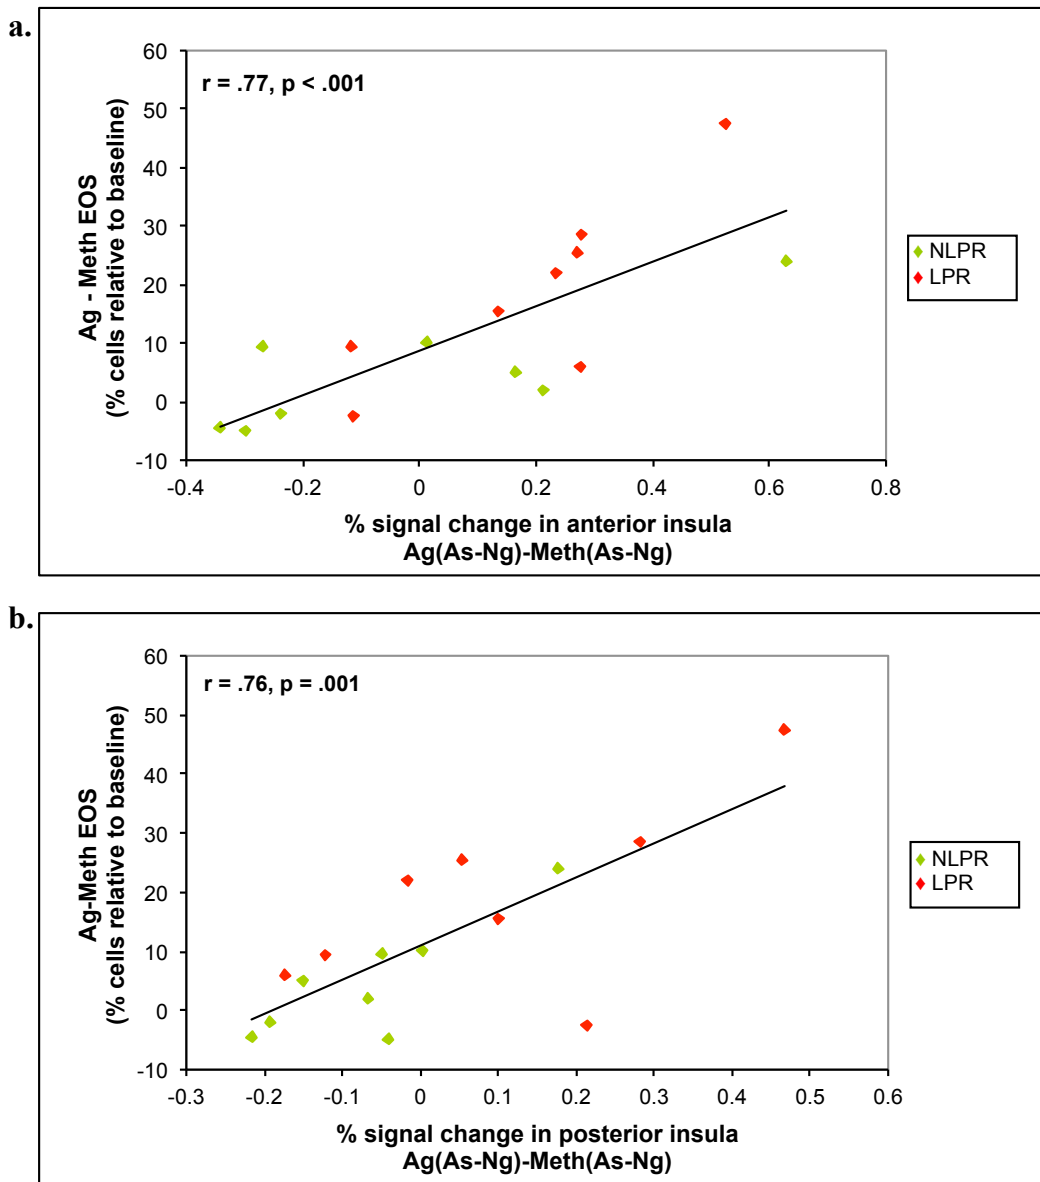

**Figure 3:** Insula activity predicts peripheral measures of inflammatory potential in asthmatic participants.

Percent signal change in the (a) anterior ( $r = .77, p < .001$ ) and (b) posterior ( $r = .76, p = .001$ ) insula in response to asthma, compared to negative words, during antigen, relative to methacholine challenge (Ag[As-Ng]-Meth[As-Ng]) and percentage of EOS in sputum during late phase antigen relative to methacholine challenge [Ag-Meth].
