# Supplementary material for: Are There Neurophenotypes for Asthma? Functional Brain Imaging of the Interaction between Emotion and Inflammation in Asthma
Source: PLOS journal article supplement (doi:10.1371/journal.pone.0040921), 2012-08-01
Supplement: S4 (10.1371/journal.pone.0040921.s004) [file journal.pone.0040921.s004]

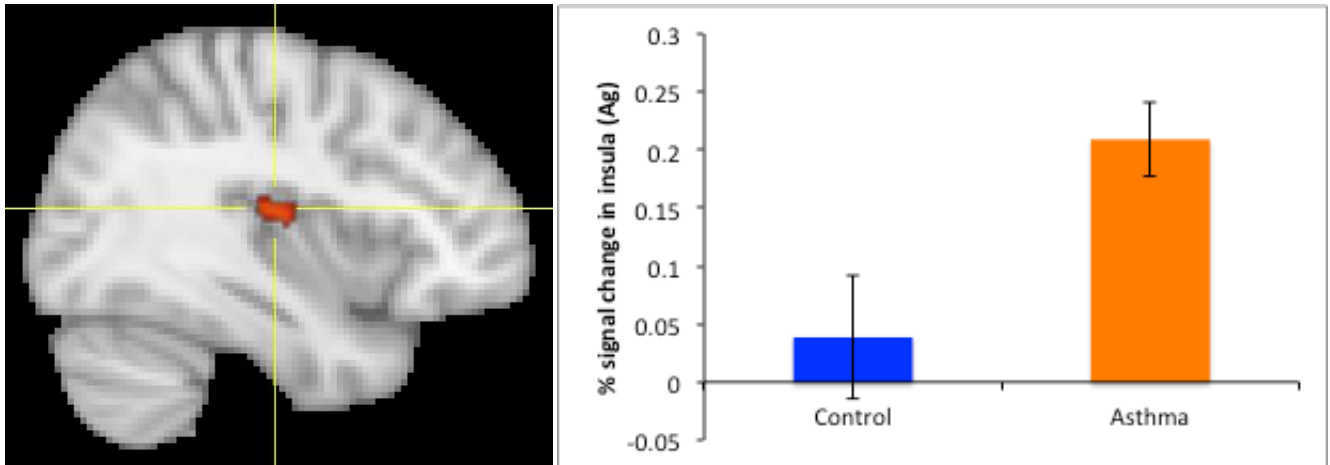

**Figure 1:** Posterior insula is more active in individuals with asthma (collapsed across group) than controls during Ag challenge ( $t(25) = -2.95, p < .01$ ).
